# Supplementary material for: Didanosine-loaded poly(epsilon-caprolactone) microparticles by a coaxial electrohydrodynamic atomization (CEHDA) technique
Source: Royal Society of Chemistry journal article supplement (doi:10.1039/c4tb00664j), 2014-10-15
Supplement: c4tb00664j1.pdf [file c4tb00664j1.pdf]

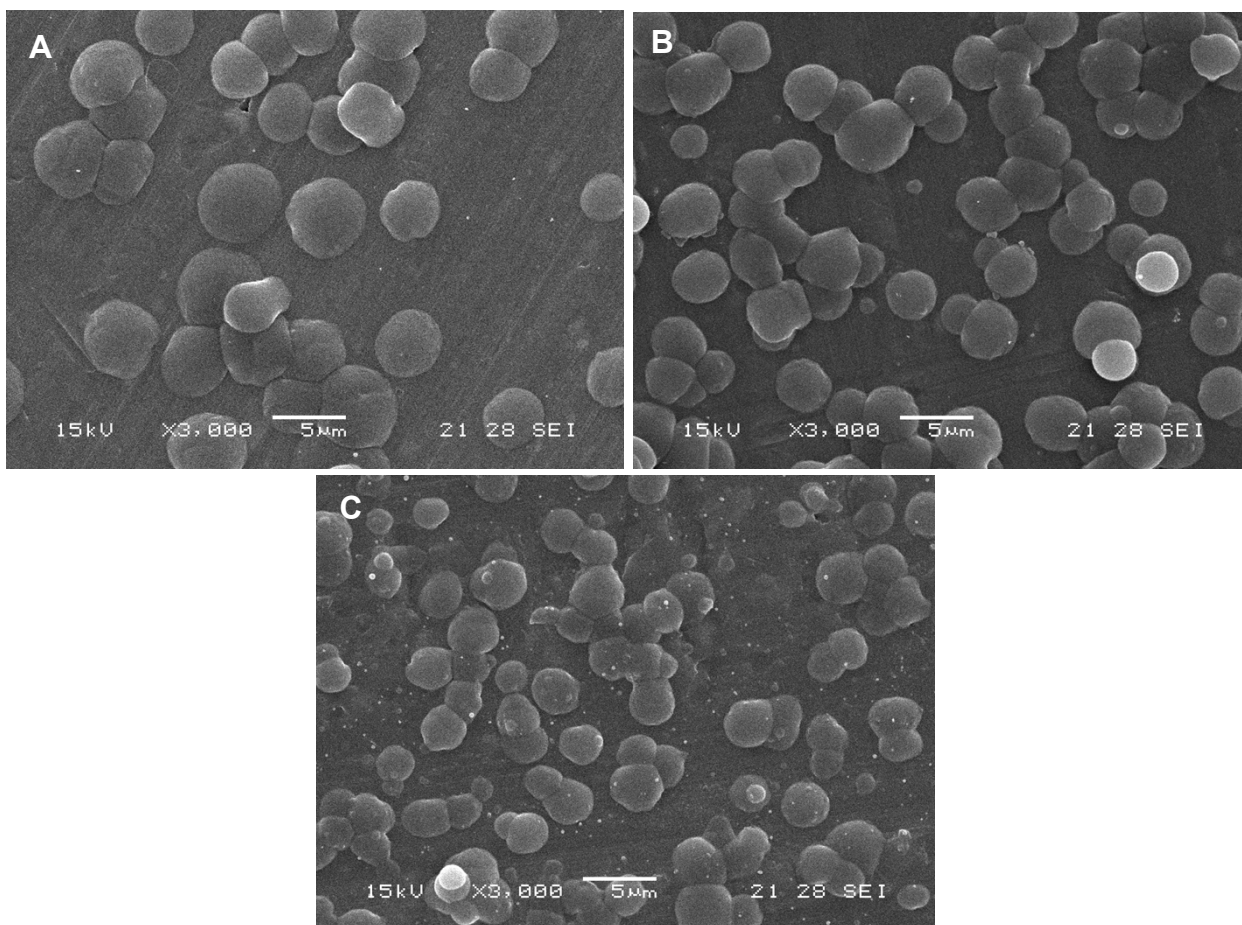

**Figure S1.** SEM micrographs of PCL<sub>14</sub> particles obtained by EHDA using (A) 10% w/v, (B) 12.5% w/v and (C) 15% w/v concentrations in DCM:DMA (75:25). Scale bar = 5 µm.
